# Supplementary material for: Identification of the Begomoviruses Squash Leaf Curl Virus and Watermelon Chlorotic Stunt Virus in Various Plant Samples in North America
Source: MDPI journal article supplement (doi:10.3390/v13050810), 2021-04-30
Supplement: s1 [file s1]

Supplementary Table S1

| Sample # | Lab ID    | Sample                                              | Country | Collection year | Note                    | Family        |
|----------|-----------|-----------------------------------------------------|---------|-----------------|-------------------------|---------------|
| 1        | DBGHerb1  | <i>Amaranthus</i> sp.                               | USA     | 2019            | Desert botanical garden | Amaranthaceae |
| 2        | DBGHerb2  | <i>Helianthus</i> sp.                               | USA     | 2019            | Desert botanical garden | Asteraceae    |
| 3        | DBGHerb3  | <i>Cucurbita</i> sp.                                | USA     | 2019            | Desert botanical garden | Cucurbitaceae |
| 4        | DBGHerb4  | <i>Capsicum</i> sp.                                 | USA     | 2019            | Desert botanical garden | Solanaceae    |
| 5        | DBGHerb5  | <i>Capsicum</i> sp.                                 | USA     | 2019            | Desert botanical garden | Solanaceae    |
| 6        | DBGHerb6  | <i>Cucurbita</i> sp.                                | USA     | 2019            | Desert botanical garden | Cucurbitaceae |
| 7        | DBGHerb7  | <i>Albemochus esculenta</i>                         | USA     | 2019            | Desert botanical garden | Malvaceae     |
| 8        | DBGHerb8  | <i>Solanum</i> sp.                                  | USA     | 2019            | Desert botanical garden | Solanaceae    |
| 9        | DBGHerb9  | <i>Solanum</i> sp.                                  | USA     | 2019            | Desert botanical garden | Solanaceae    |
| 10       | DBGHerb10 | <i>Ocimum basilicum</i>                             | USA     | 2019            | Desert botanical garden | Lamiaceae     |
| 11       | DBGHerb11 | <i>Solanum</i> sp.                                  | USA     | 2019            | Desert botanical garden | Solanaceae    |
| 12       | DBGHerb12 | <i>Cucurbita</i> sp.                                | USA     | 2019            | Desert botanical garden | Cucurbitaceae |
| 13       | DBGHerb13 | <i>Apium</i> sp.                                    | USA     | 2019            | Desert botanical garden | Apiaceae      |
| 14       | DBGHerb14 | <i>Allium</i> sp.                                   | USA     | 2019            | Desert botanical garden | Alliaceae     |
| 15       | DBGHerb15 | <i>Solanum</i> sp.                                  | USA     | 2019            | Desert botanical garden | Solanaceae    |
| 16       | DBGHerb16 | <i>Cynara scolymus</i>                              | USA     | 2019            | Desert botanical garden | Asteraceae    |
| 17       | DBGHerb17 | <i>Jasminum</i> sp.                                 | USA     | 2019            | Desert botanical garden | Oleaceae      |
| 18       | DBGHerb19 | <i>Laurus nobilis</i>                               | USA     | 2019            | Desert botanical garden | Lauraceae     |
| 19       | DBGHerb20 | <i>Rosmarinus officinalis</i>                       | USA     | 2019            | Desert botanical garden | Lamiaceae     |
| 20       | DBGHerb21 | <i>Ocimum</i> sp.                                   | USA     | 2019            | Desert botanical garden | Lamiaceae     |
| 21       | DBGHerb22 | <i>Cucumis melo</i>                                 | USA     | 2019            | Desert botanical garden | Cucurbitaceae |
| 22       | DBGHerb23 | <i>Solanum melongena</i>                            | USA     | 2019            | Desert botanical garden | Solanaceae    |
| 23       | DBGHerb24 | <i>Stevia</i> sp.                                   | USA     | 2019            | Desert botanical garden | Asteraceae    |
| 24       | DBGHerb28 | <i>Stachys byzantina</i>                            | USA     | 2019            | Desert botanical garden | Lamiaceae     |
| 25       | DBGHerb29 | <i>Apium graveolens</i>                             | USA     | 2019            | Desert botanical garden | Apiaceae      |
| 26       | KPB1      | <i>Capsicum annuum</i> 'Jalapeño'                   | USA     | 2019            | Mountain View Park      | Solanaceae    |
| 27       | KPB2      | <i>Solanum lycopersicum</i> var. <i>cerasiforme</i> | USA     | 2019            | Mountain View Park      | Solanaceae    |
| 28       | KPB3      | Basil                                               | USA     | 2019            | Mountain View Park      | Lamiaceae     |
| 29       | KPB4      | Unknown                                             | USA     | 2019            | Mountain View Park      | Unknown       |
| 30       | SF1       | Unknown                                             | USA     | 2019            | Schnepf Farms           | Unknown       |
| 31       | SF2       | <i>Raphanus sativus</i>                             | USA     | 2019            | Schnepf Farms           | Brassicaceae  |
| 32       | SF3       | <i>Solanum melongena</i>                            | USA     | 2019            | Schnepf Farms           | Solanaceae    |
| 33       | SF4       | <i>Cucurbita</i> sp.                                | USA     | 2019            | Schnepf Farms           | Cucurbitaceae |
| 34       | SF5       | unknown                                             | USA     | 2019            | Schnepf Farms           | unknown       |
| 35       | SF6       | <i>Capsicum</i> sp.                                 | USA     | 2019            | Schnepf Farms           | Solanaceae    |
| 36       | MVN1      | <i>Physalis philadelphica</i>                       | USA     | 2019            | Moon Valley Nursery     | Solanaceae    |
| 37       | MVN2      | <i>Solanum lycopersicum</i>                         | USA     | 2019            | Moon Valley Nursery     | Solanaceae    |
| 38       | MVN3      | <i>Solanum lycopersicum</i>                         | USA     | 2019            | Moon Valley Nursery     | Solanaceae    |
| 39       | MVN4      | <i>Solanum lycopersicum</i>                         | USA     | 2019            | Moon Valley Nursery     | Solanaceae    |
| 40       | MVN5      | <i>Solanum lycopersicum</i> 'Early Girl'            | USA     | 2019            | Moon Valley Nursery     | Solanaceae    |
| 41       | MVN6      | <i>Solanum lycopersicum</i> 'Better Boy'            | USA     | 2019            | Moon Valley Nursery     | Solanaceae    |
| 42       | MVN7      | <i>Solanum lycopersicum</i> var. <i>cerasiforme</i> | USA     | 2019            | Moon Valley Nursery     | Solanaceae    |
| 43       | MVN8      | <i>Solanum lycopersicum</i> 'Celebrity'             | USA     | 2019            | Moon Valley Nursery     | Solanaceae    |
| 44       | MVN9      | <i>Solanum lycopersicum</i>                         | USA     | 2019            | Moon Valley Nursery     | Solanaceae    |
| 45       | MVN10     | <i>Solanum lycopersicum</i>                         | USA     | 2019            | Moon Valley Nursery     | Solanaceae    |
| 46       | CG5       | <i>Solanum lycopersicum</i>                         | USA     | 2018            | Community garden        | Solanaceae    |
| 47       | CG6       | <i>Solanum lycopersicum</i>                         | USA     | 2018            | Community garden        | Solanaceae    |
| 48       | SWAT      | <i>Citrullus lanatus</i>                            | USA     | 2018            | Community garden        | Cucurbitaceae |

Supplementary Table S2

| Virus target | Primer         | Sequence                        |
|--------------|----------------|---------------------------------|
| SLCV DNA-A   | LCM_SP_41_F    | AGCTGACATATCCCATACCTCTTTAATTCA  |
| SLCV DNA-A   | LCM_SP_41_R    | TTATTTATAGGGACCACACTTAGTCACCAA  |
| SLCV DNA-B   | DBG_SP_15973_F | CTGTCGCTCATTATGTTTTGGAGAGTATTC  |
| SLCV DNA-B   | DBG_SP_15973_R | CATTAACAACCATTGTGAGTGTTAAACGAA  |
| SLCV DNA-B   | LCM_SP_1332_F  | TGCGATTGGGAAAAGTCTTAACATAACTAG  |
| SLCV DNA-B   | LCM_SP_1332_R  | CAAGAACGTACATAAAAATTGAAACGACTGC |
| SLCV DNA-B   | LCM_SP_2634_F  | ATGTAATTGGGATTAGCTTAGGGATTTTGG  |
| SLCV DNA-B   | LCM_SP_2634_R  | TATTAGTTCGCTTTACGCTCACATTAGTTG  |
| SLCV DNA-B   | LCM_SP_58_F    | TTAACTTCGCCTTTAATTTGTACTGTACACA |
| SLCV DNA-B   | LCM_SP_58_R    | TCACTTTGTCAATTTGAATTAAGTCGAGC   |
| WCSV DNA-A   | WCSV_A_F       | TTCTAAATACCCCTTAAGAAACGACCAGTCT |
| WCSV DNA-A   | WCSV_A_R       | CGCAGGTTCTAAAATACCTCGATATGTTAG  |
| WCSV DNA-B   | LCM_SP_242_F   | AATCGTATTGGGTGTTTTGGAGTATTTTCAT |
| WCSV DNA-B   | LCM_SP_242_R   | ACCAGCTCAATTACTTTTCGCTTAATTATCC |
